# Supplementary material for: Public Health Nurses’ Knowledge and Attitudes Regarding Climate Change
Source: PubMed Central journal article supplement (PMC3295355; doi:10.1289/ehp.1104025), 2011-11-29
Supplement: ehp.1104025.s001.pdf [file ehp.1104025.s001.pdf]

SUPPLEMENTAL MATERIAL

**Public Health Nurses' Knowledge and Attitudes Regarding Climate Change**

Barbara J. Polivka  
Rosemary V. Chaudry  
John Mac Crawford  
*The Ohio State University  
Colleges of Nursing and Public Health  
Columbus, Ohio, USA*

**Table of Content**

Supplemental Material, Table 1: Perceptions of the relationships between humans and environment ..... 2  
Supplemental Material, Table 2. Attitudes toward climate change..... 3  
Supplemental Material, Table 3. Locality of health-related impacts of climate change..... 4

**Supplemental Material, Table 1:** Perceptions of relationships between humans and the environment

|                                                                                               | Agree <sup>a</sup> | Neutral   | <sup>b</sup> Disagree |
|-----------------------------------------------------------------------------------------------|--------------------|-----------|-----------------------|
| Relationship between humans and the environment                                               | N (%)              | N (%)     | N (%)                 |
| Humans are severely abusing the environment.                                                  | 132 (75.0)         | 11 (6.3)  | 33 (18.8)             |
| Plants and animals have as much right as humans to exist.                                     | 124 (70.9)         | 20 (11.4) | 31 (17.7)             |
| When humans interfere with nature it often produces disastrous consequences.                  | 121 (69.1)         | 25 (14.3) | 29 (16.6)             |
| The earth has plenty of natural resources if we just learn how to develop them.               | 99 (57.2)          | 22 (12.7) | 52 (30.1)             |
| We are approaching the limit of the number of people the earth can support.                   | 99 (56.3)          | 29 (16.5) | 48 (27.3)             |
| Humans have the right to modify the natural environment to suit their needs.                  | 61 (34.9)          | 15 (8.6)  | 99 (56.6)             |
| Humans will eventually learn enough about how nature works to be able to control it.          | 33 (18.8)          | 23 (13.1) | 120 (68.2)            |
| The balance of nature is strong enough to cope with the impacts of modern industrial nations. | 27 (15.4)          | 24 (13.7) | 124 (70.9)            |

<sup>a</sup>Agree includes strongly agree, somewhat agree, and mildly agree.

<sup>b</sup>Disagree includes strongly disagree, somewhat disagree, and mildly disagree.

**Supplemental Material, Table 2.** Attitudes toward climate change

---

| Variable                                | N (%)      |
|-----------------------------------------|------------|
| Cause of climate change:                |            |
| Human                                   | 75 (45.5)  |
| Balance of natural and human            | 72 (43.6)  |
| Natural                                 | 18 (10.9)  |
| Extent climate change is:               |            |
| Bad                                     | 109 (66.1) |
| Neutral                                 | 46 (27.9)  |
| Good                                    | 10 (6.1)   |
| Extent climate change is:               |            |
| Controllable                            | 82 (49.7)  |
| Uncontrollable                          | 59 (35.8)  |
| Neither uncontrollable nor controllable | 24 (14.5)  |

---

**Supplemental Material, Table 3.** Locality of health-related impacts of climate change

| In the next 20 years, the health-related impacts of climate change will be serious in: | Agree <sup>a</sup> | Neutral   | Disagree <sup>b</sup> |
|----------------------------------------------------------------------------------------|--------------------|-----------|-----------------------|
|                                                                                        | N (%)              | N (%)     | N (%)                 |
| My jurisdiction                                                                        | 104 (64.6)         | 30 (18.6) | 27 (16.8)             |
| The United States                                                                      | 123 (76.4)         | 19 (11.8) | 19 (11.8)             |
| Around the world                                                                       | 131 (81.4)         | 13 (8.1)  | 17 (10.6)             |

<sup>a</sup>Agree includes strongly agree, somewhat agree, and mildly agree.

<sup>b</sup>Disagree includes strongly disagree, somewhat disagree, and mildly disagree.
